# Supplementary material for: Underreplicated Regions in Drosophila melanogaster Are Enriched with Fast-Evolving Genes and Highly Conserved Noncoding Sequences
Source: PubMed Central journal article supplement (PMC4159006; doi:10.1093/gbe/evu156), 2014-07-24
Supplement: supp_evu156_supplementary_figure_S1.pdf [file supp_evu156_supplementary_figure_S1.pdf]

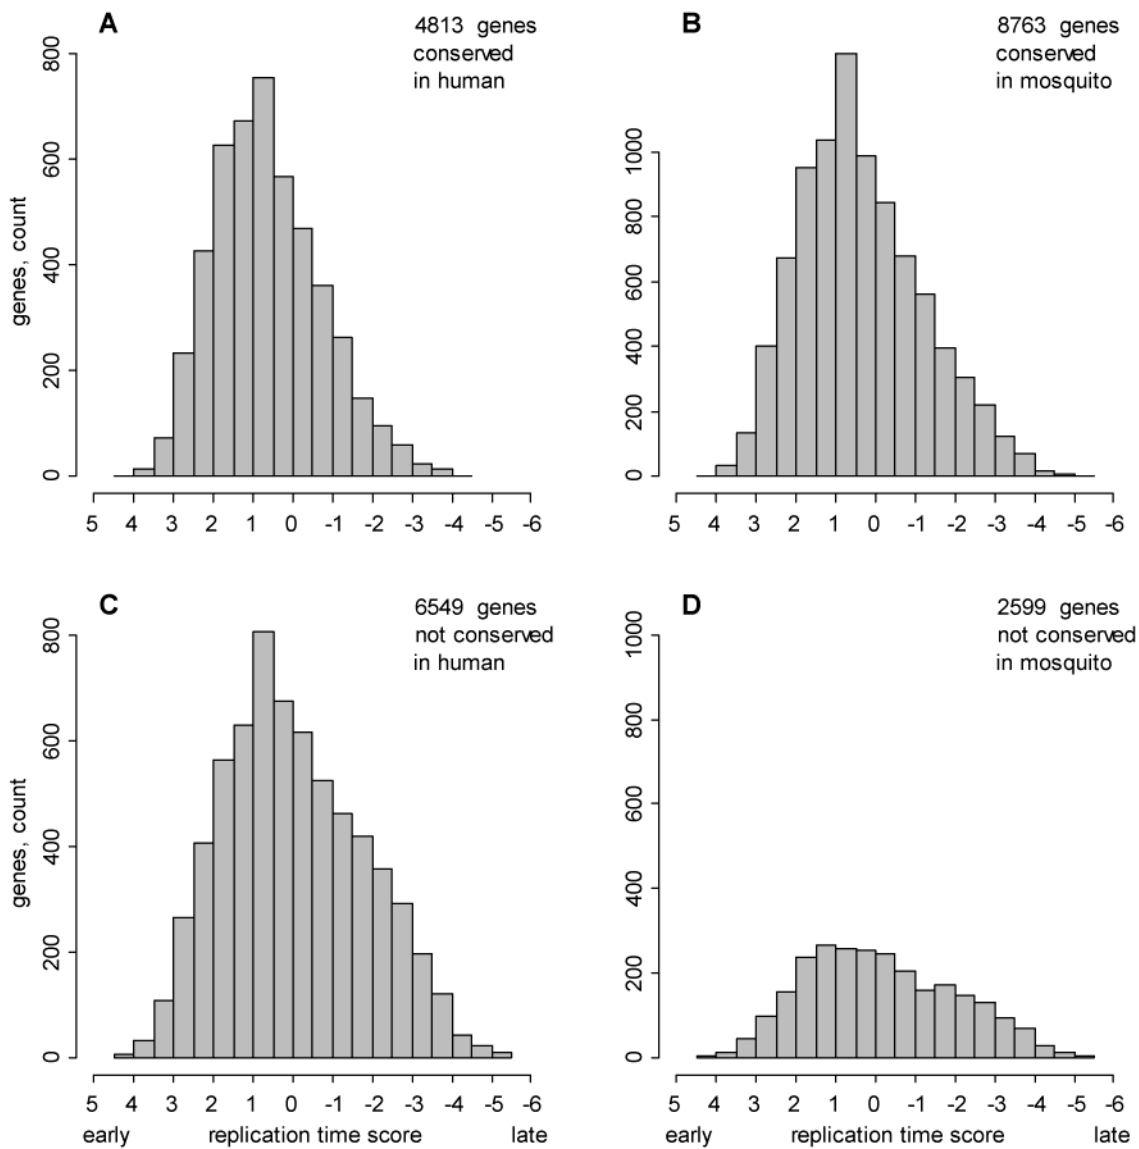

Supplementary fig. S1. Replication timing for genes on chromosomes 2 and 3 in C18 cells. (A) Genes with homologs in the human genome. (B) Genes with homologs in the mosquito genome. (C) Genes without human homologs. (D) Genes without mosquito homologs.
